# Supplementary material for: Ceratinadins E and F, New Bromotyrosine Alkaloids from an Okinawan Marine Sponge Pseudoceratina sp
Source: PubMed Central journal article supplement (PMC6316200; doi:10.3390/md16120463), 2018-11-23

## Supplementary Materials

### Ceratinadins E and F, new bromotyrosine alkaloids from an Okinawan marine sponge *Pseudoceratina* sp.

*Shin-ichiro Kurimoto*<sup>1</sup>, *Taito Ohno*<sup>1</sup>, *Rei Hokari*<sup>2</sup>, *Aki Ishiyama*<sup>2</sup>, *Masato Iwatsuki*<sup>2</sup>, *Satoshi Ōmura*<sup>2</sup>, *Jun'ichi Kobayashi*<sup>3</sup> and *Takaaki Kubota*<sup>1,\*</sup>

<sup>1</sup>Showa Pharmaceutical University, 3-3165 Higashi-Tamagawagakuen, Machida, Tokyo 194-8543, Japan.

<sup>2</sup>Kitasato Institute for Life Sciences, Kitasato University, 5-9-1 Shirokane, Minato-ku, Tokyo 108-8641, Japan.

<sup>3</sup>Graduate School of Pharmaceutical Sciences, Hokkaido University, Sapporo 060-0812, Japan.

Table of Contents:

**Figure S1.** ESIMS spectrum (positive ion mode) of ceratinadin E (**1**).

**Figure S2.** Expanded ESIMS spectrum (positive ion mode) of ceratinadin E (**1**).

**Figure S3.** HRESIMS data (positive ion mode) of ceratinadin E (**1**).

**Figure S4.** <sup>1</sup>H NMR spectrum of ceratinadin E (**1**) in CD<sub>3</sub>OD (600 MHz).

**Figure S5.** <sup>13</sup>C NMR spectrum of ceratinadin E (**1**) in CD<sub>3</sub>OD (150 MHz).

**Figure S6.** <sup>1</sup>H-<sup>1</sup>H COSY spectrum of ceratinadin E (**1**) in CD<sub>3</sub>OD (600 MHz).

**Figure S7.** HSQC spectrum of ceratinadin E (**1**) in CD<sub>3</sub>OD (600 MHz).

**Figure S8.** HMBC spectrum of ceratinadin E (**1**) in CD<sub>3</sub>OD (600 MHz).

**Figure S9.** ECD spectrum of ceratinadin E (**1**) in CH<sub>3</sub>OH.

**Figure S10.** ESIMS spectrum (positive ion mode) of ceratinadin F (**2**).

**Figure S11.** Expanded ESIMS spectrum (positive ion mode) of ceratinadin F (**2**).

**Figure S12.** HRESIMS data (positive ion mode) of ceratinadin F (**2**).

**Figure S13.** <sup>1</sup>H NMR spectrum of ceratinadin F (**2**) in CD<sub>3</sub>OD (600 MHz).

**Figure S14.** <sup>13</sup>C NMR spectrum of ceratinadin F (**2**) in CD<sub>3</sub>OD (150 MHz).

**Figure S15.** <sup>1</sup>H-<sup>1</sup>H COSY spectrum of ceratinadin F (**2**) in CD<sub>3</sub>OD (600 MHz).

**Figure S16.** HSQC spectrum of ceratinadin F (**2**) in CD<sub>3</sub>OD (600 MHz).

**Figure S17.** HMBC spectrum of ceratinadin F (**2**) in CD<sub>3</sub>OD (600 MHz).

**Figure S18.** ECD spectrum of ceratinadin F (**2**) in CH<sub>3</sub>OH.

**Figure S1.** ESIMS spectrum (positive ion mode) of ceratinadin E (**1**).

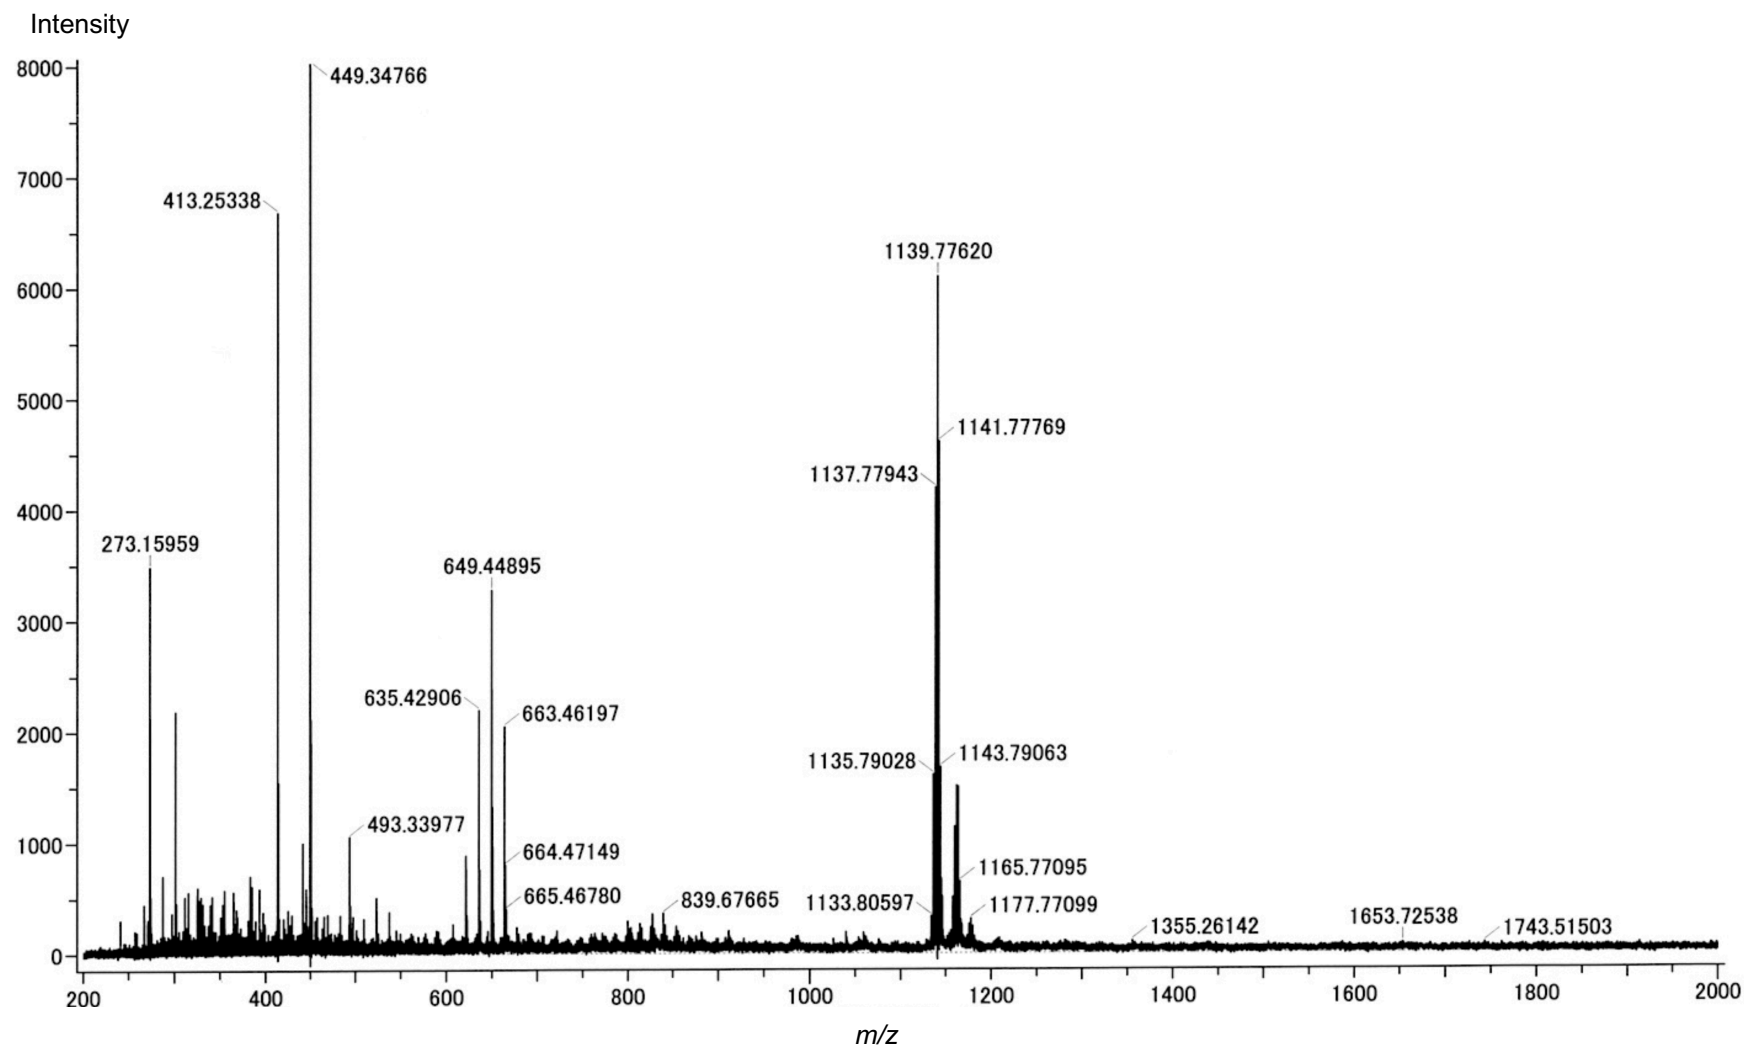

**Figure S2.** Expanded ESIMS spectrum (positive ion mode) of ceratinadin E (1).

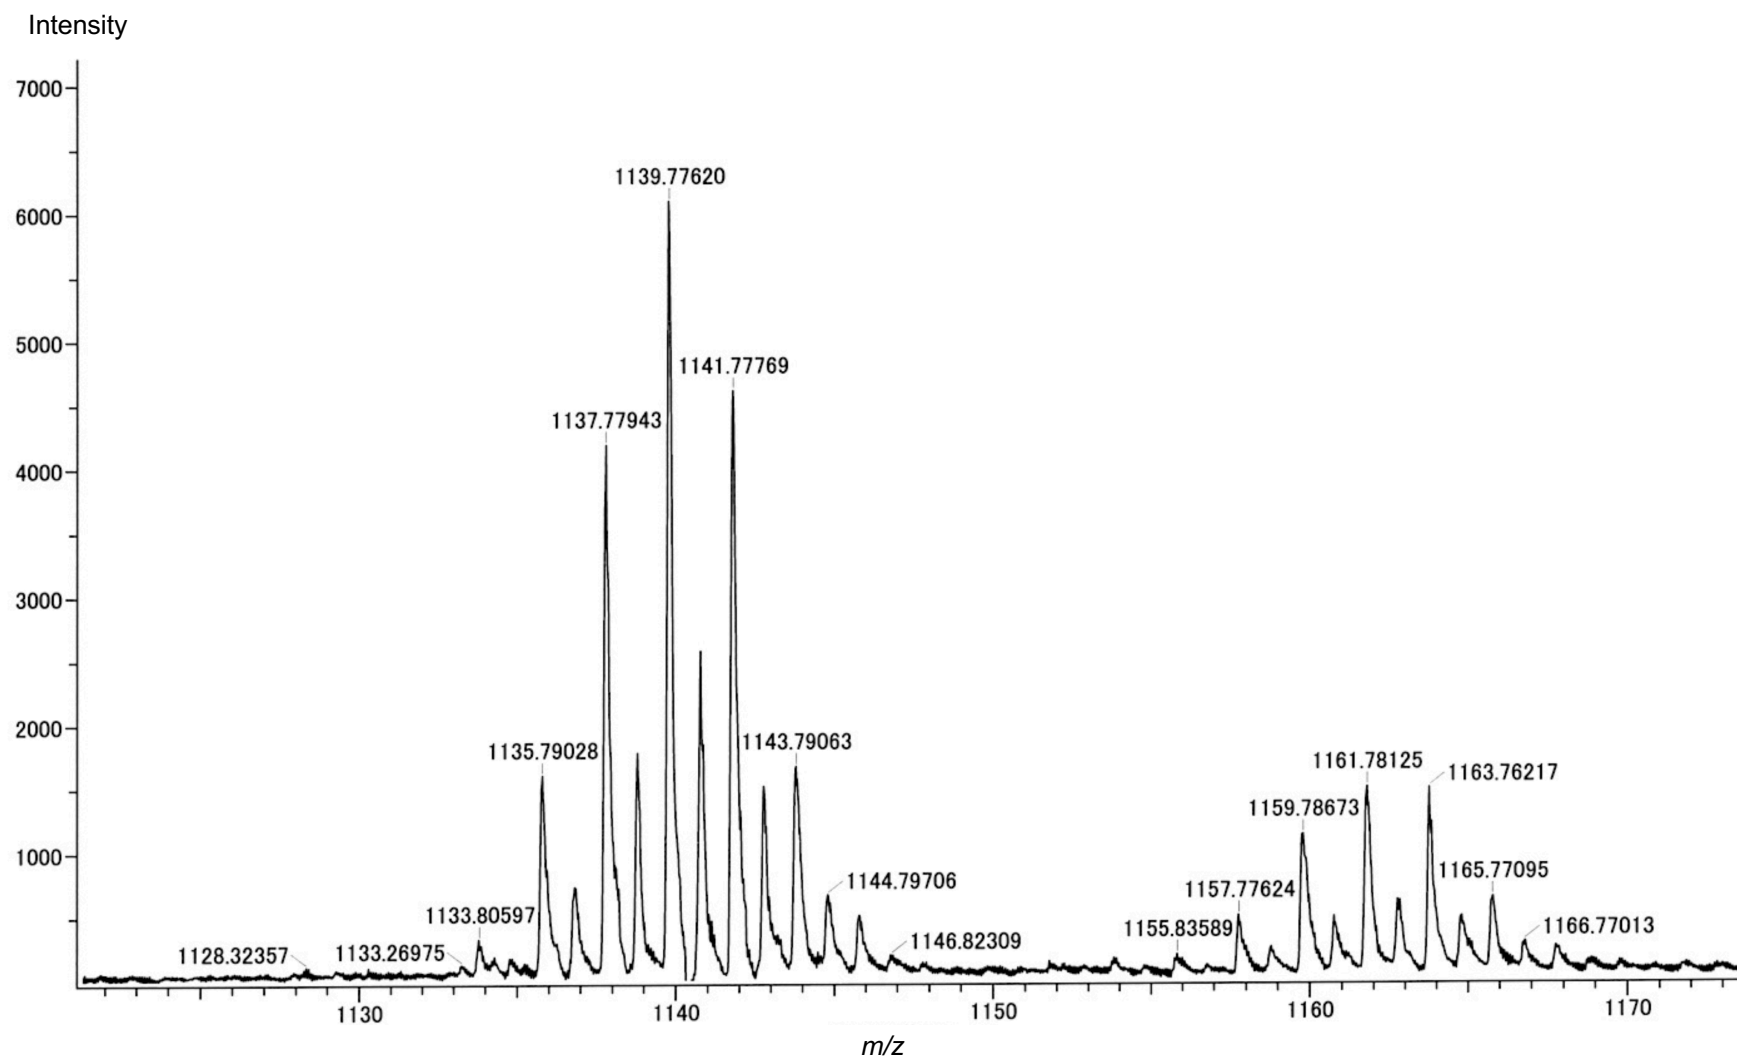

**Figure S3.** HRESIMS (positive) data of ceratinadin E (**1**).

| <i>m/z</i> | Intensity | Theo. Mass | Delta (mmu) | Composition                                                                                         | RDB equiv. |
|------------|-----------|------------|-------------|-----------------------------------------------------------------------------------------------------|------------|
| 1139.80628 | 184575.00 | 1139.80722 | -0.94       | $^{12}\text{C}_{35}^{1}\text{H}_{42}^{79}\text{Br}_3^{81}\text{Br}_3^{14}\text{N}_5^{16}\text{O}_8$ | 14.5       |

**Figure S4.**  $^1\text{H}$  NMR spectrum of ceratinadin E (**1**) in  $\text{CD}_3\text{OD}$  (600 MHz).

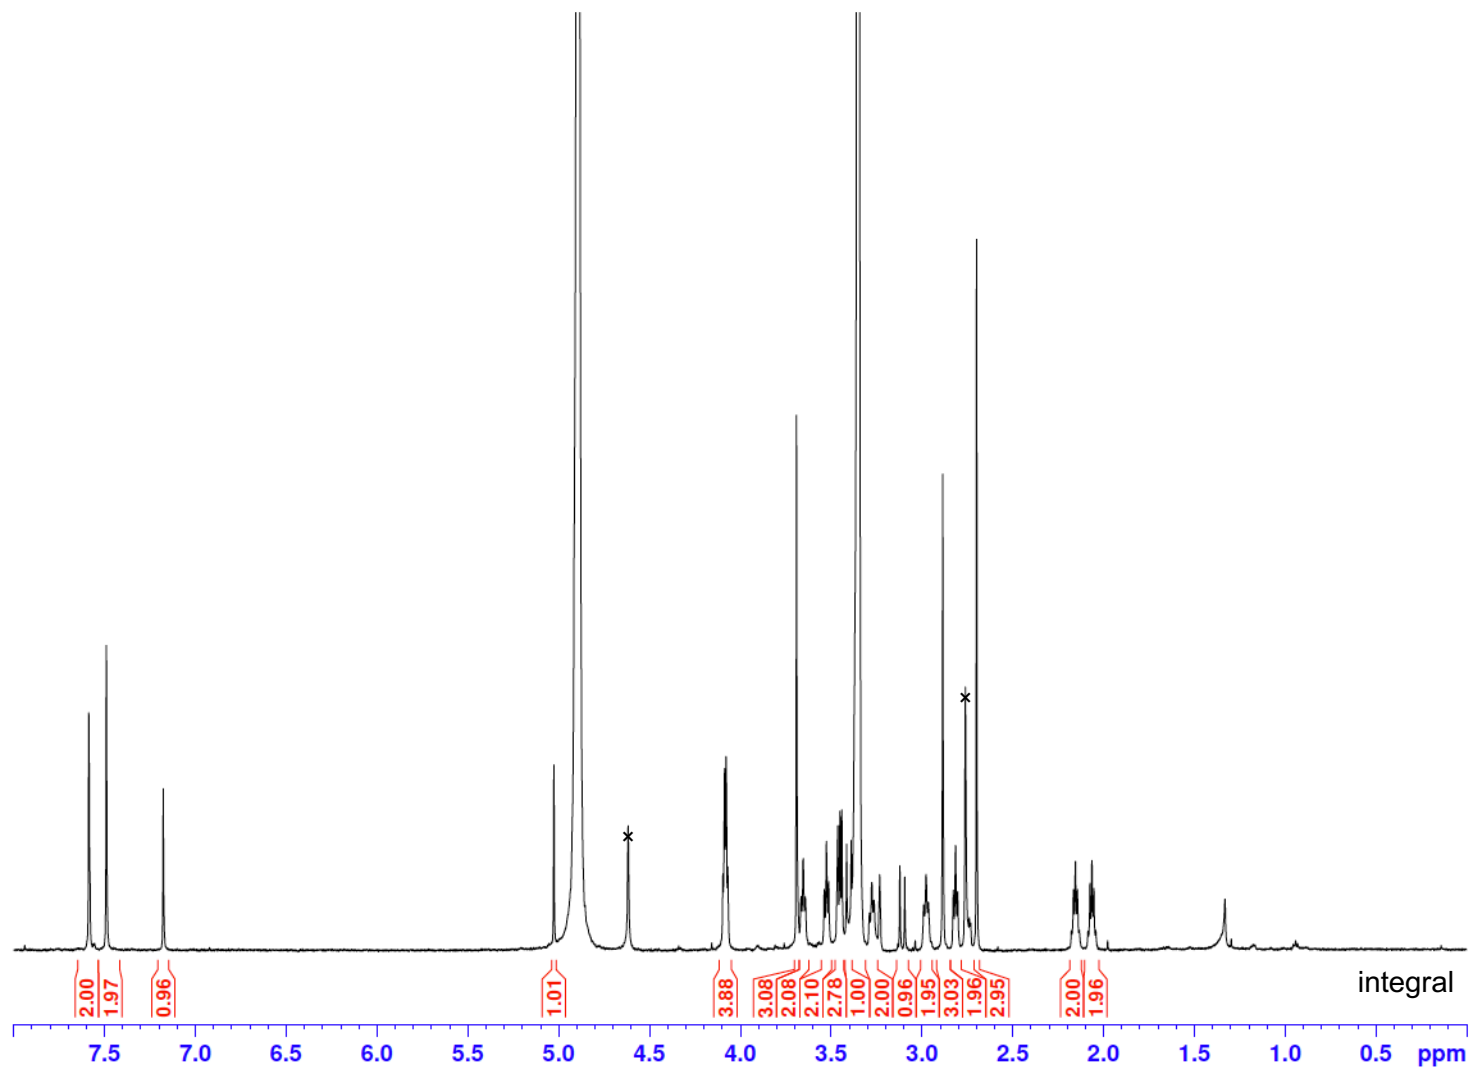

**Figure S5.**  $^{13}\text{C}$  NMR spectrum of ceratinadin E (**1**) in  $\text{CD}_3\text{OD}$  (150 MHz).

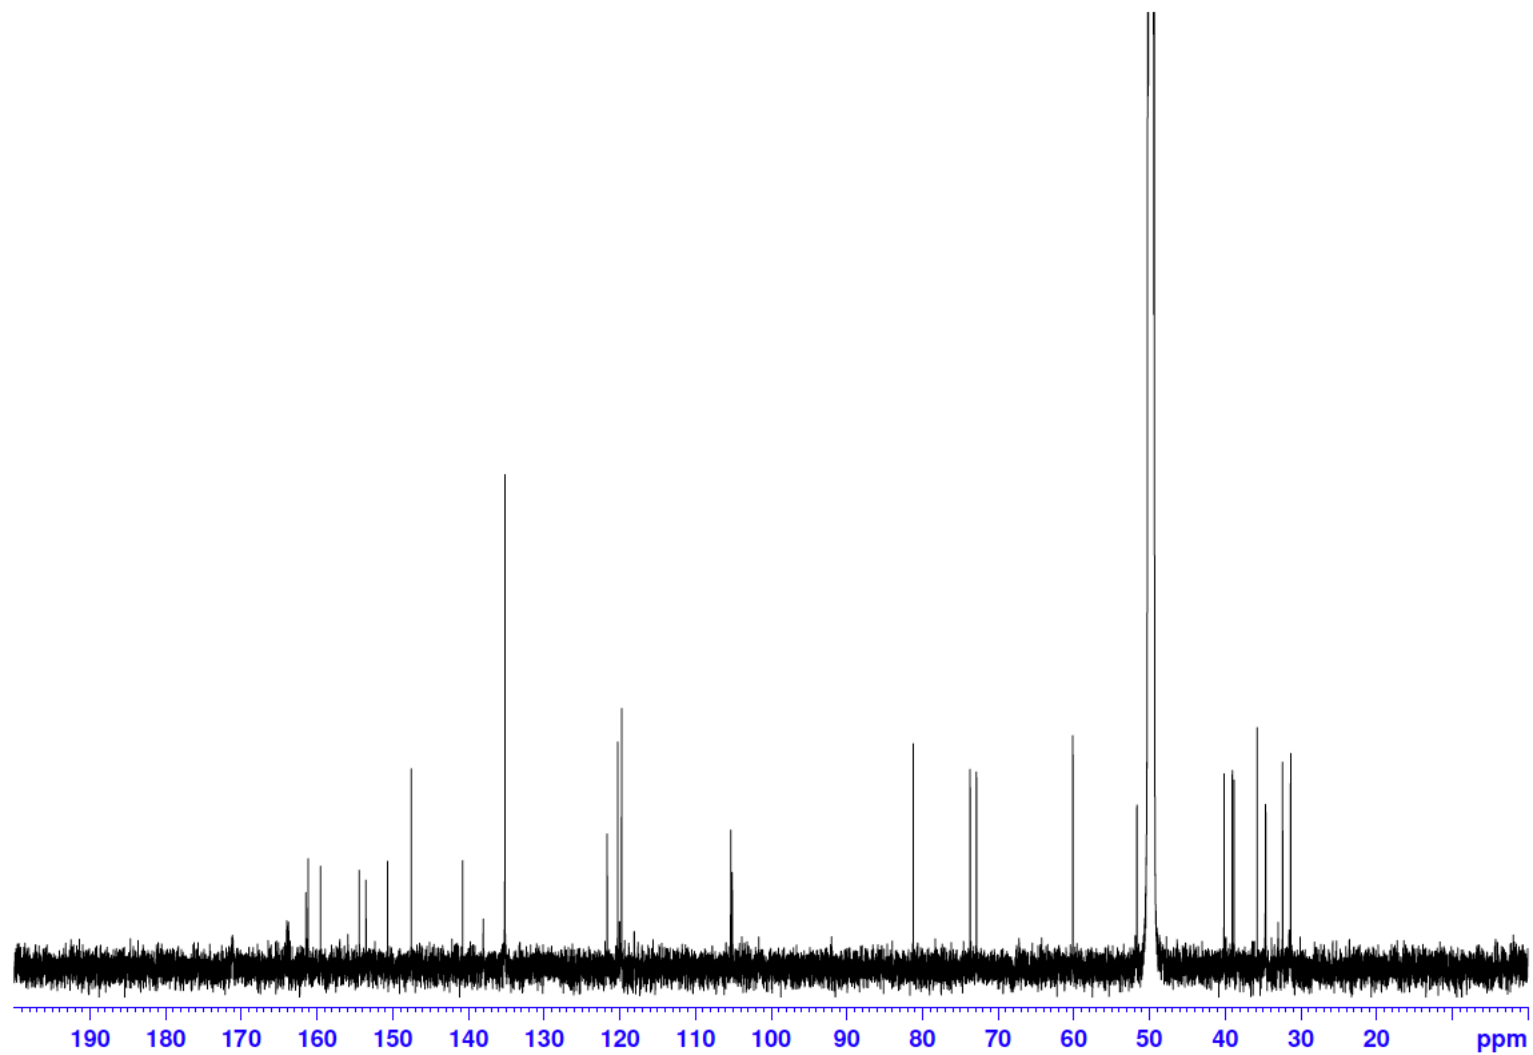

**Figure S6.**  $^1\text{H}$ - $^1\text{H}$  COSY spectrum of ceratinadin E (**1**) in  $\text{CD}_3\text{OD}$  (600 MHz).

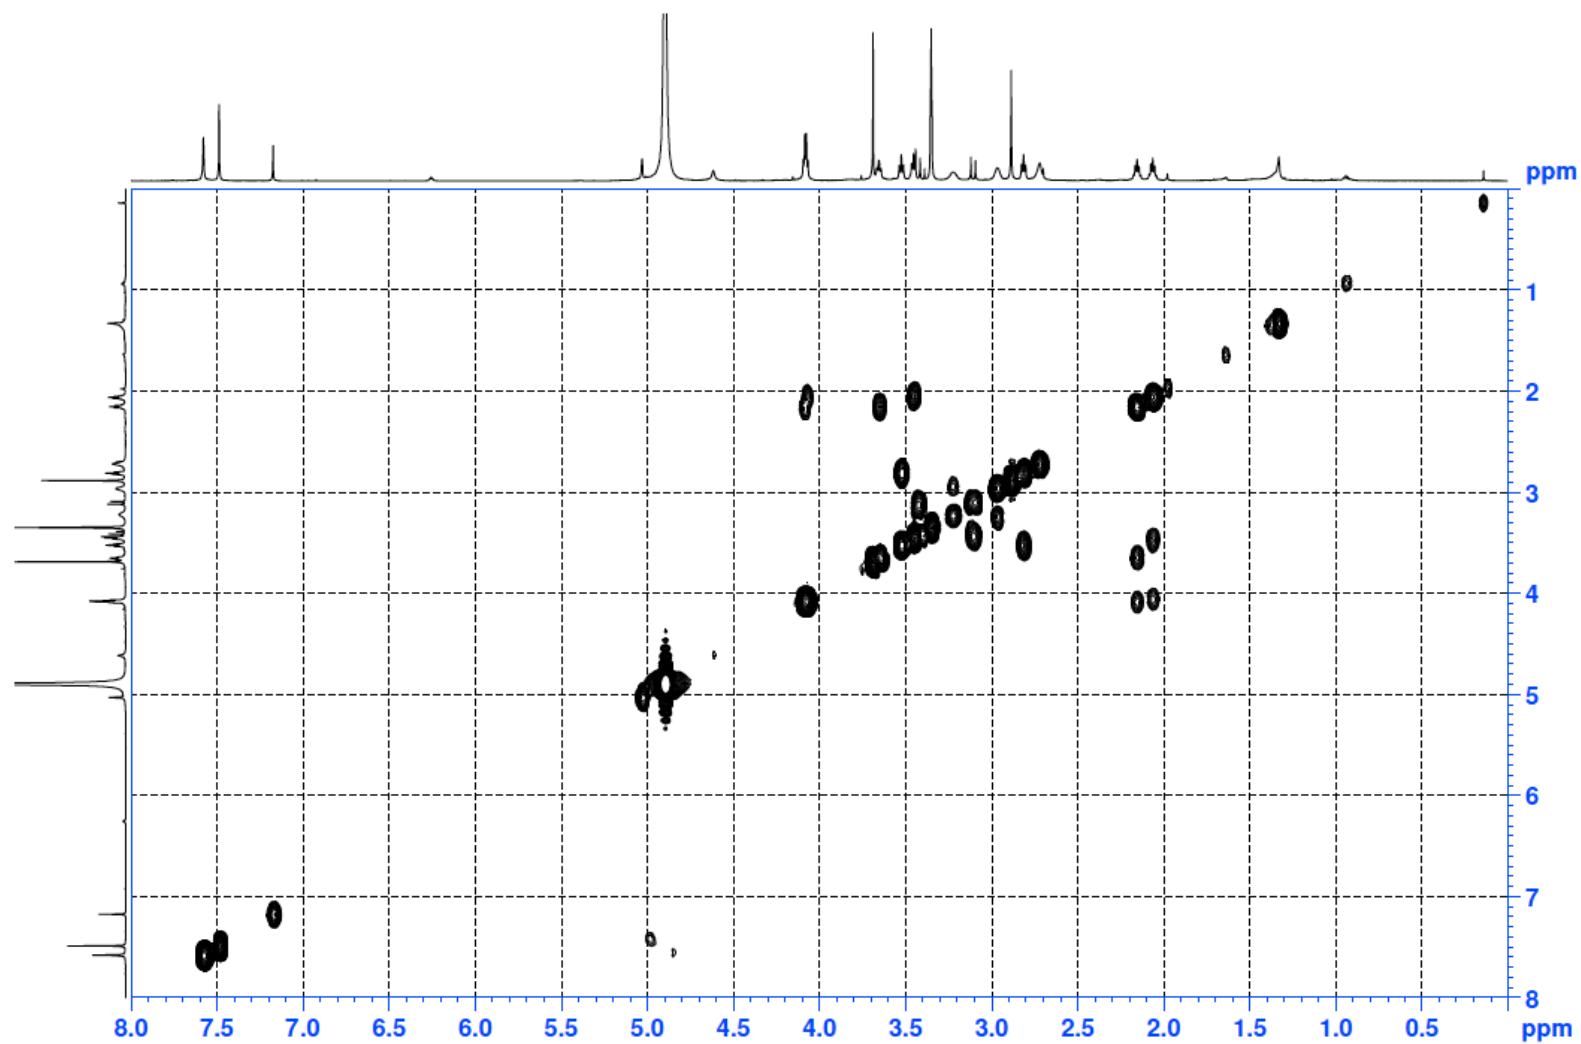

Figure S7. HSQC spectrum of ceratinadin E (1) in CD<sub>3</sub>OD (600 MHz).

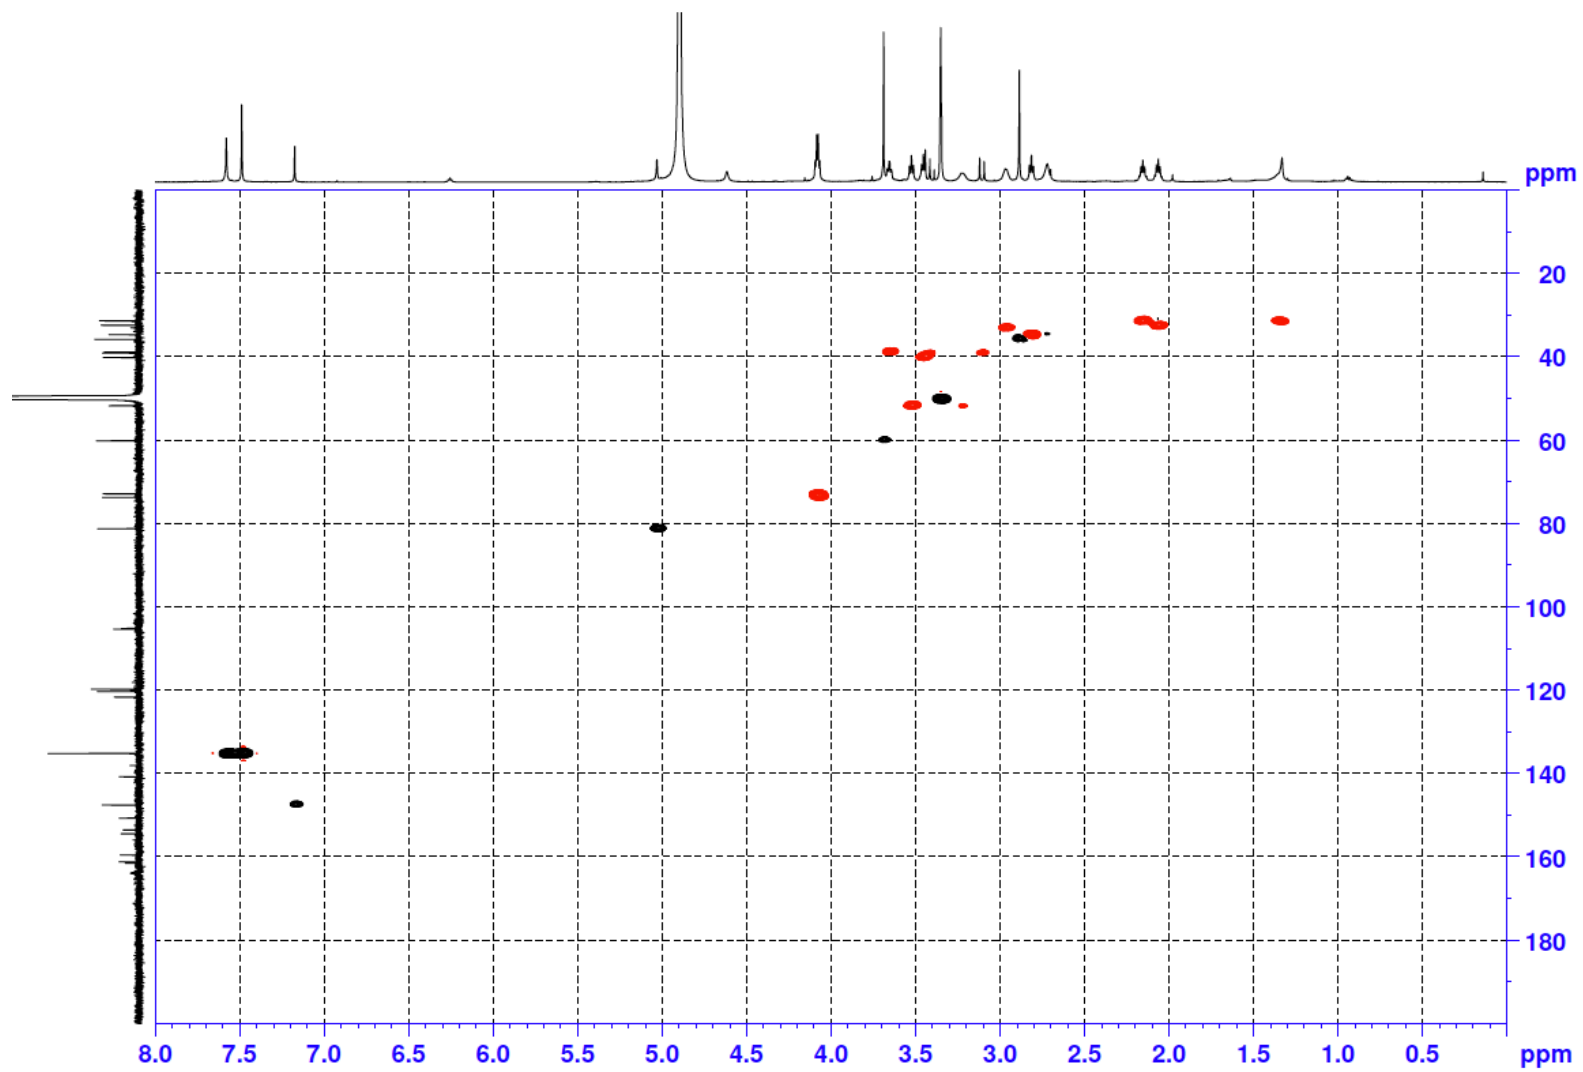



Figure S8. HMBC spectrum of ceratinadin E (1) in CD<sub>3</sub>OD (600 MHz).

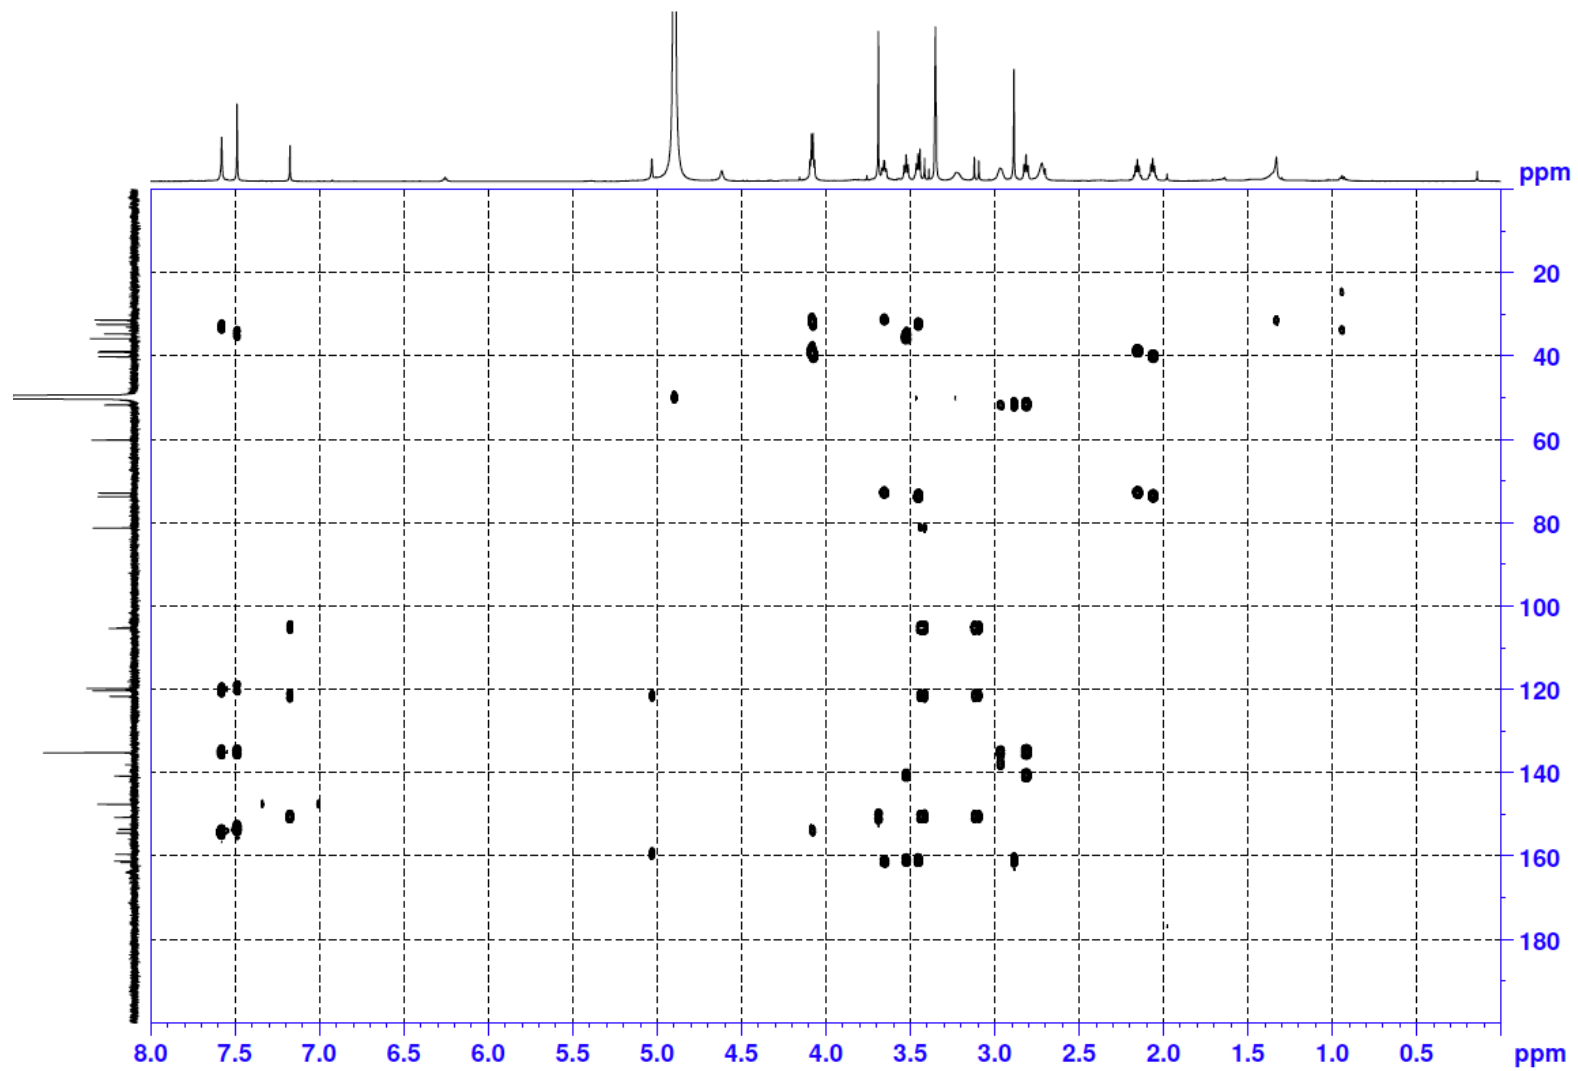

**Figure S9.** ECD spectrum of ceratinadin E (**1**) in CH<sub>3</sub>OH.

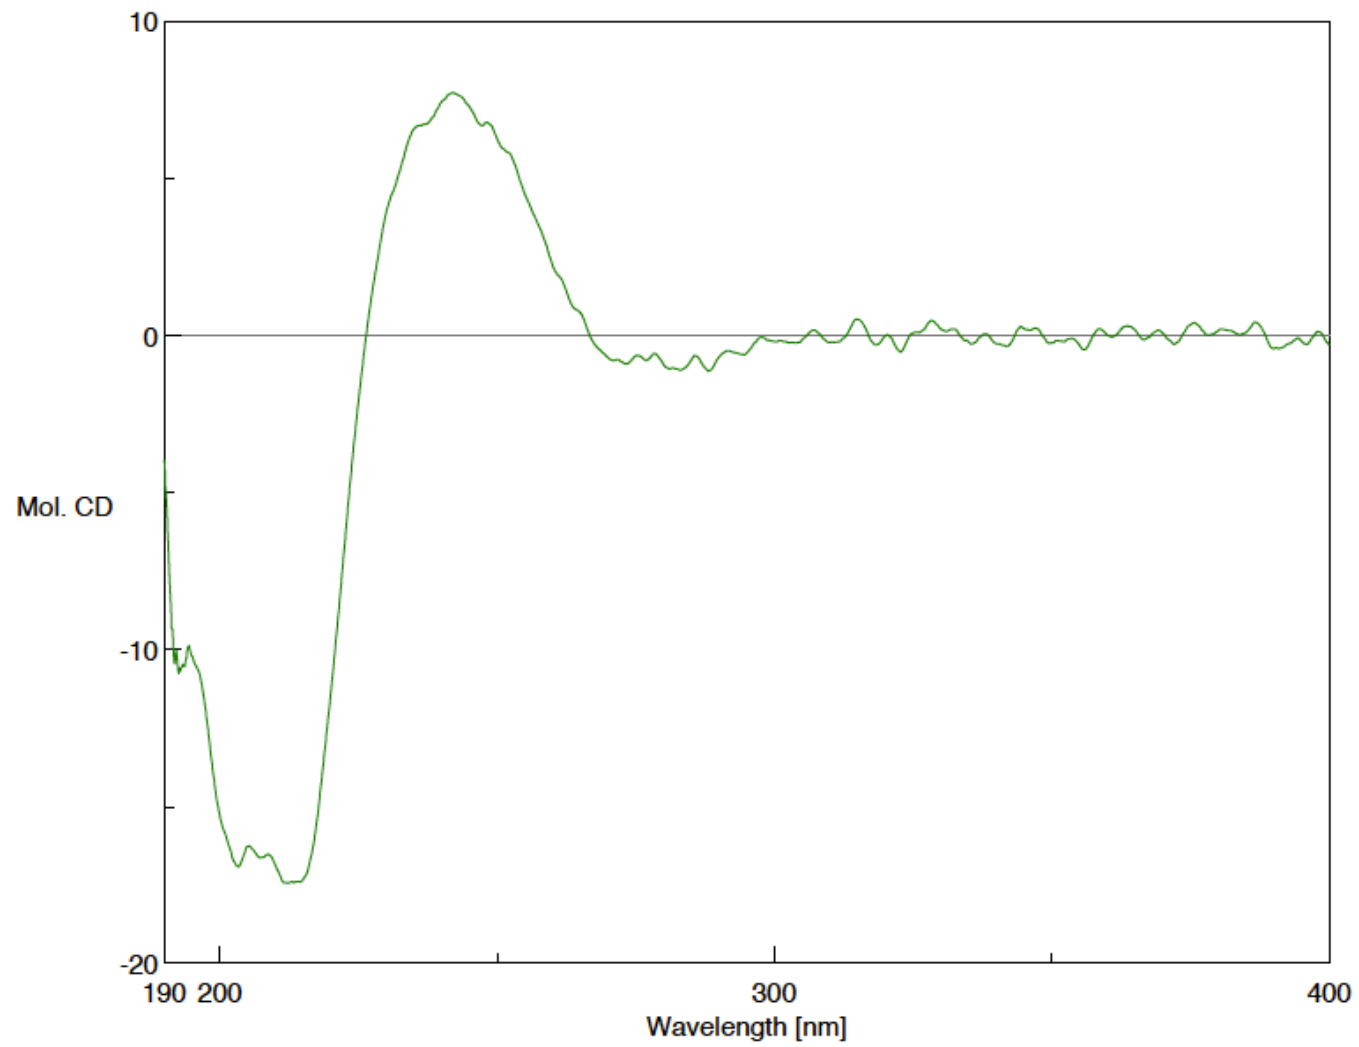

**Figure S10.** ESIMS spectrum (positive ion mode) of ceratinadin F (**2**).

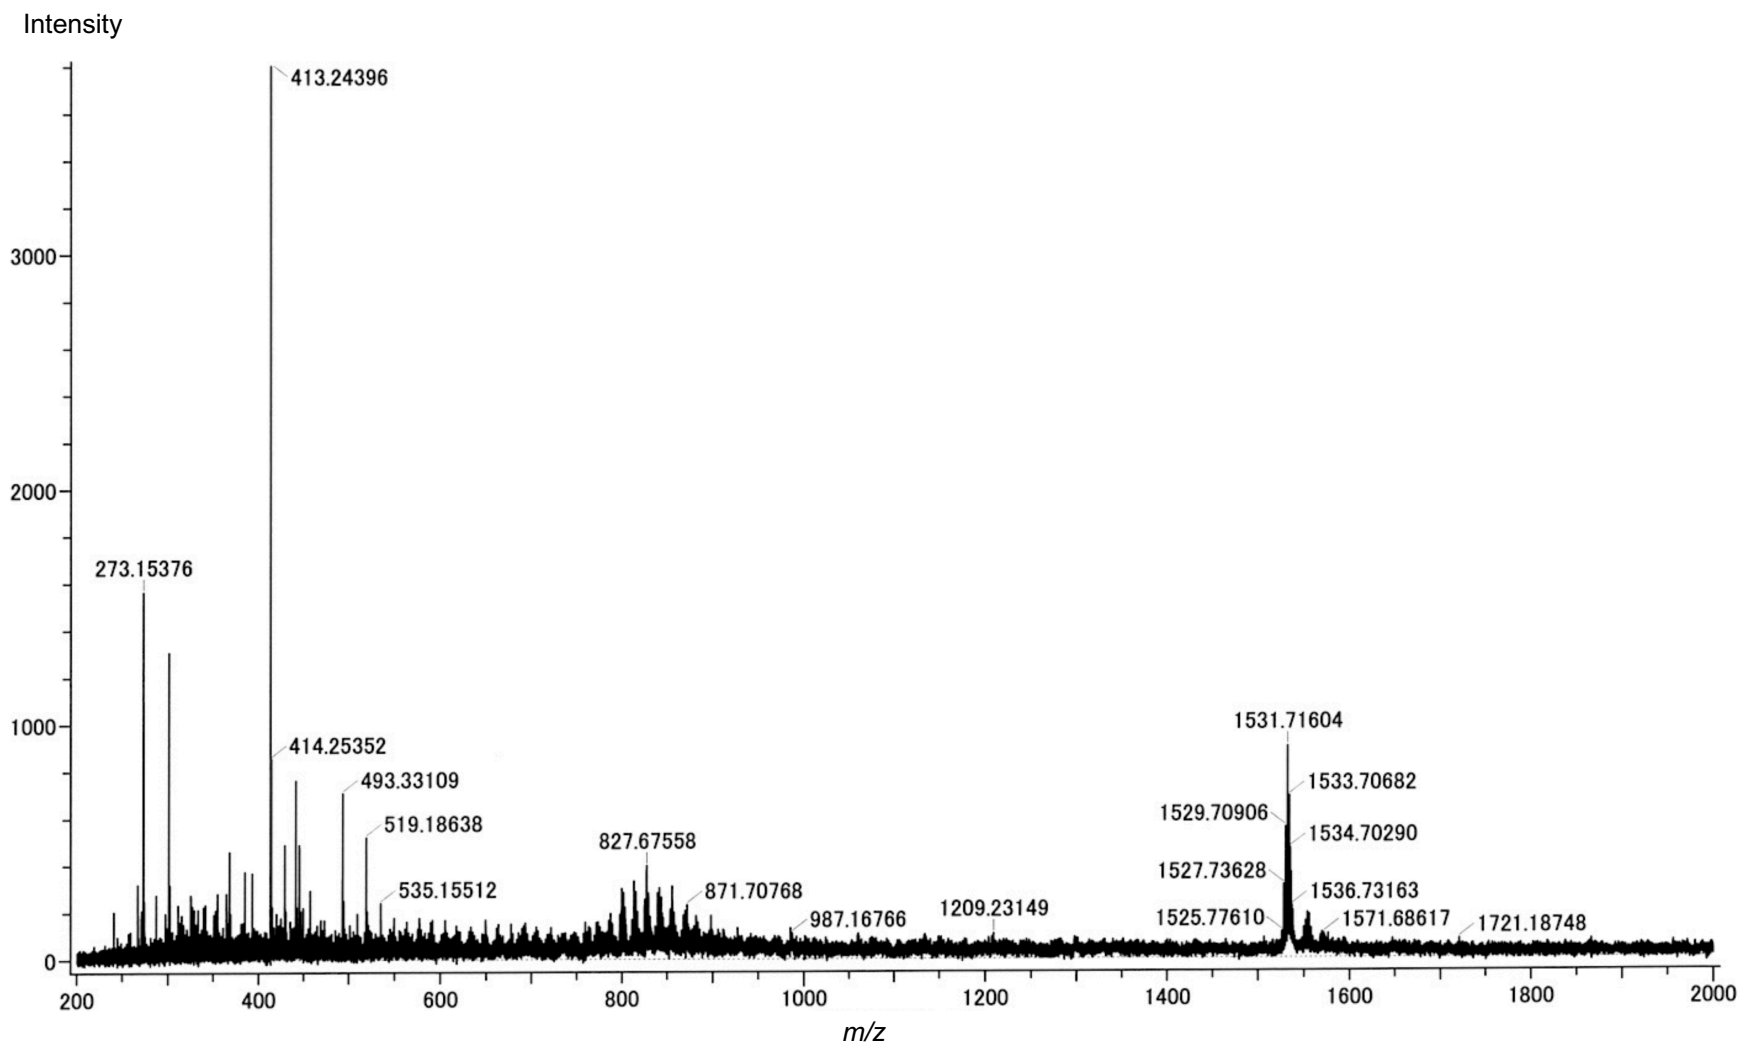

**Figure S11.** Expanded ESIMS spectrum (positive ion mode) of ceratinadin F (2).

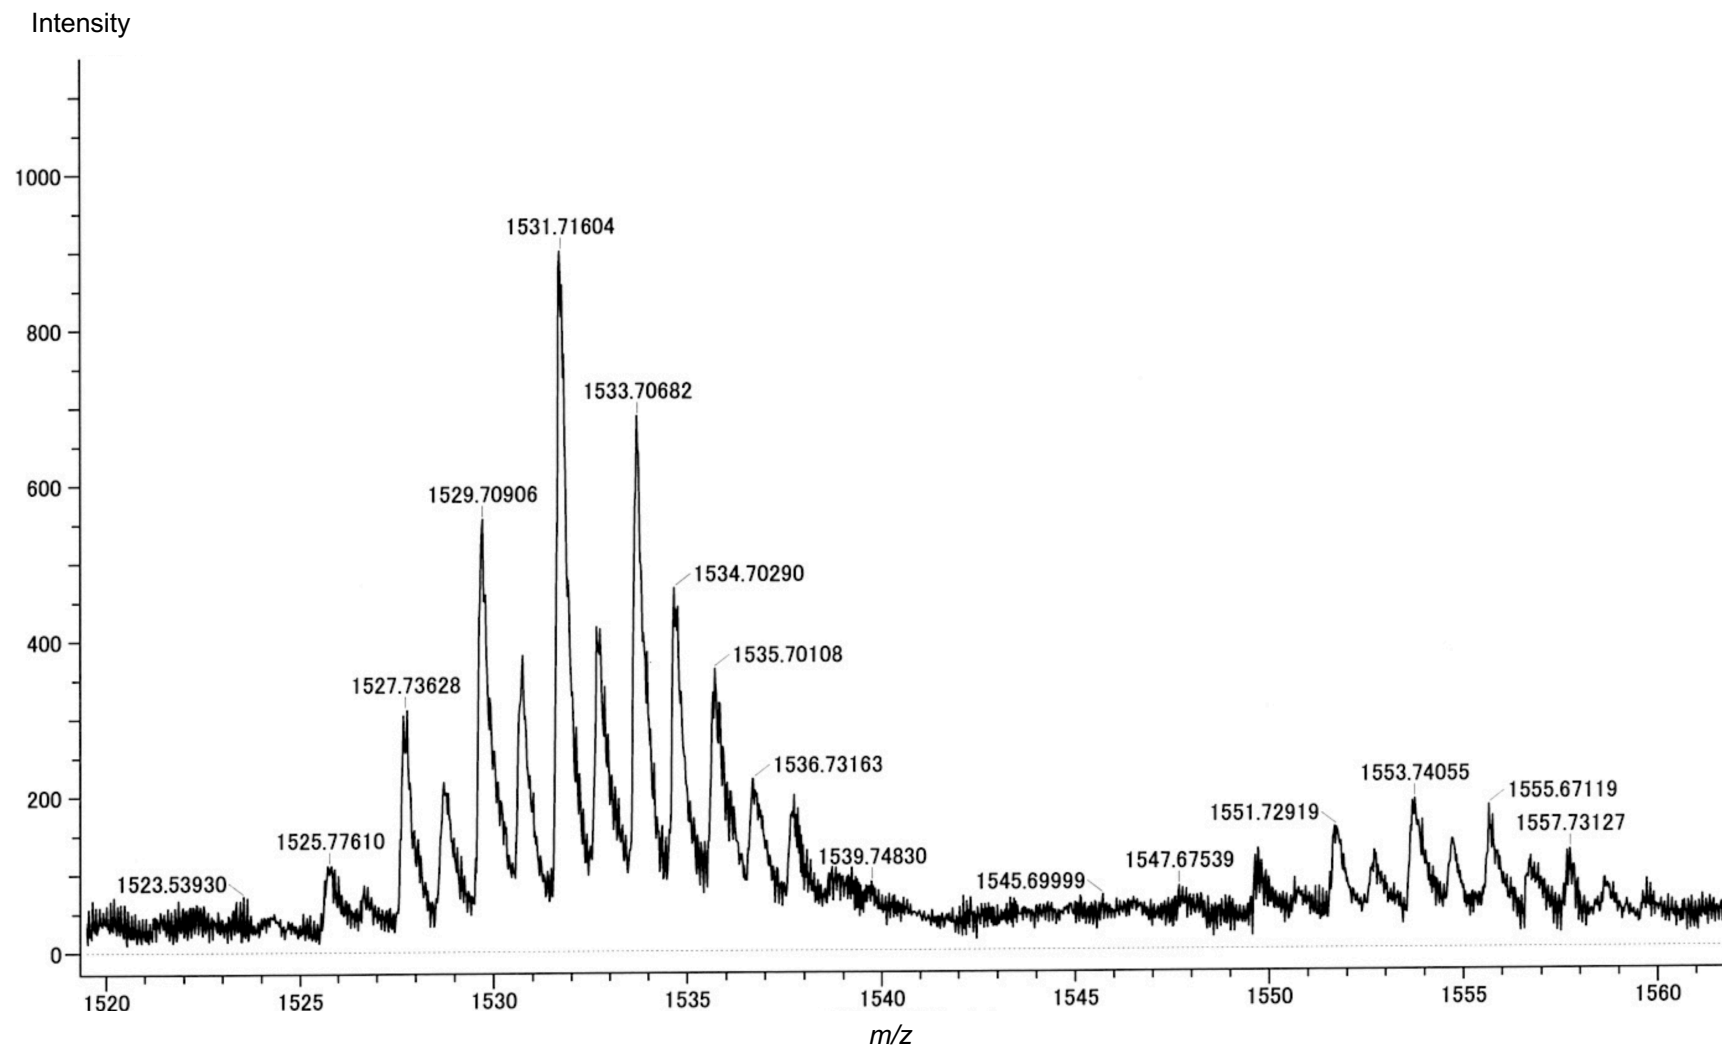

**Figure S12.** HRESIMS (positive) data of ceratinadin F (2).

| <i>m/z</i> | Intensity | Theo. Mass | Delta (mmu) | Composition                                                                                            | RDB equiv. |
|------------|-----------|------------|-------------|--------------------------------------------------------------------------------------------------------|------------|
| 1531.76647 | 508623.19 | 1531.76303 | 3.43        | $^{12}\text{C}_{48}^{1}\text{H}_{58}^{79}\text{Br}_4^{81}\text{Br}_4^{14}\text{N}_7^{16}\text{O}_{10}$ | 19.5       |

**Figure S13.**  $^1\text{H}$  NMR spectrum of ceratinadin F (**2**) in  $\text{CD}_3\text{OD}$  (600 MHz).

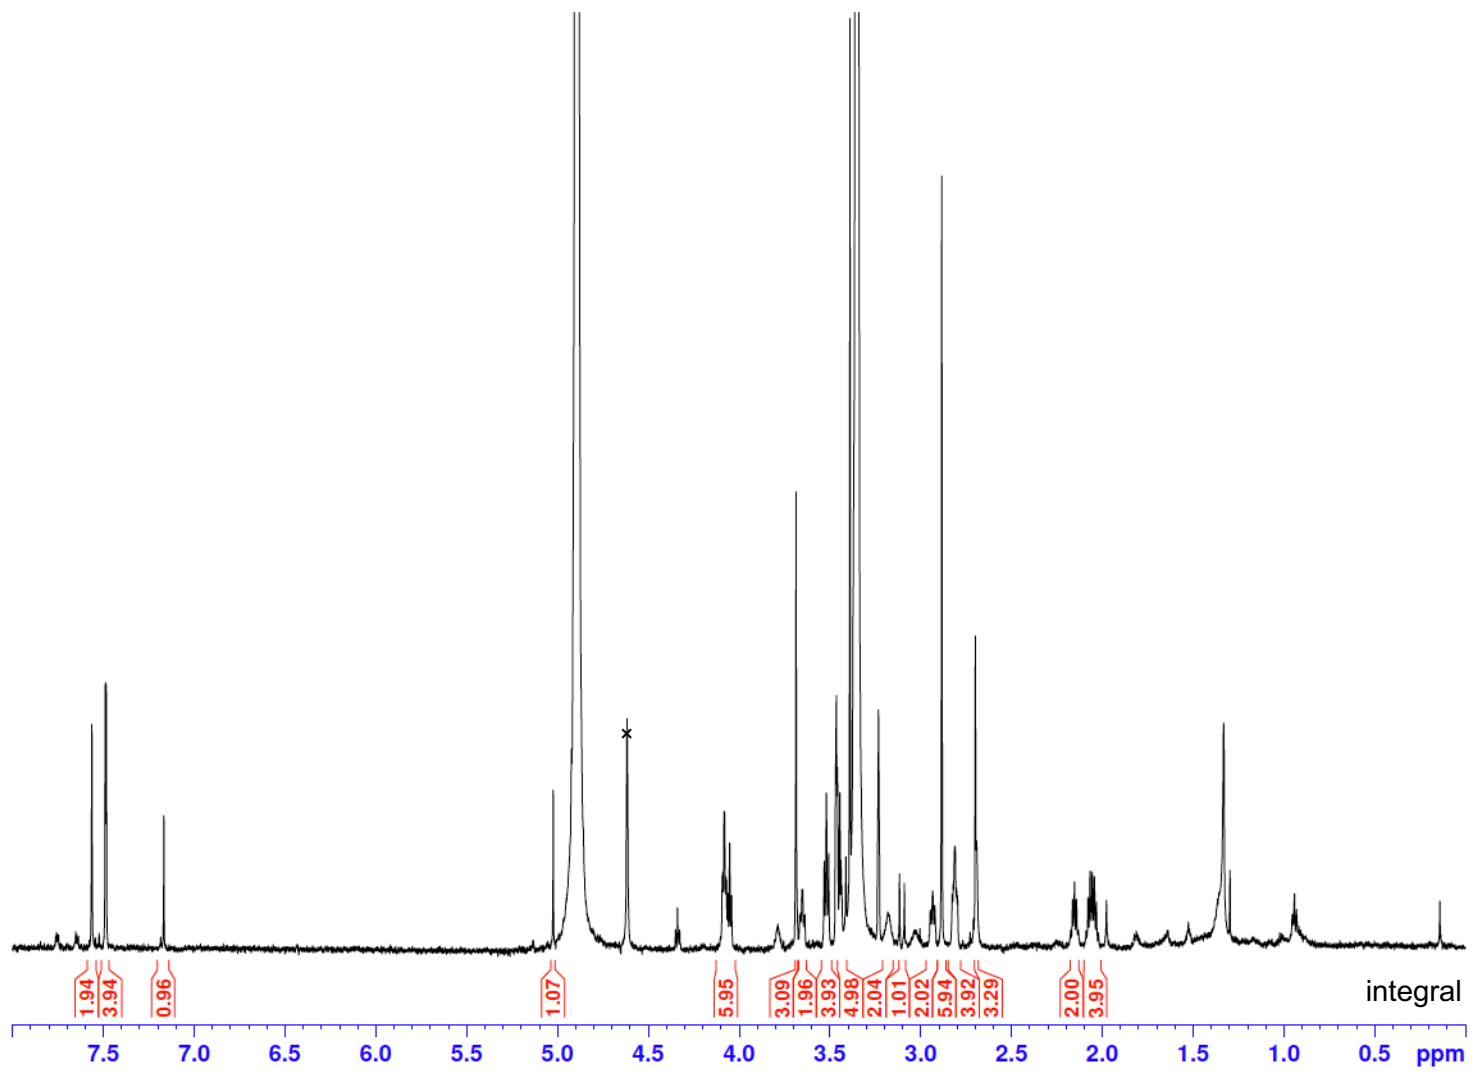

**Figure S14.**  $^{13}\text{C}$  NMR spectrum of ceratinadin F (**2**) in  $\text{CD}_3\text{OD}$  (150 MHz).

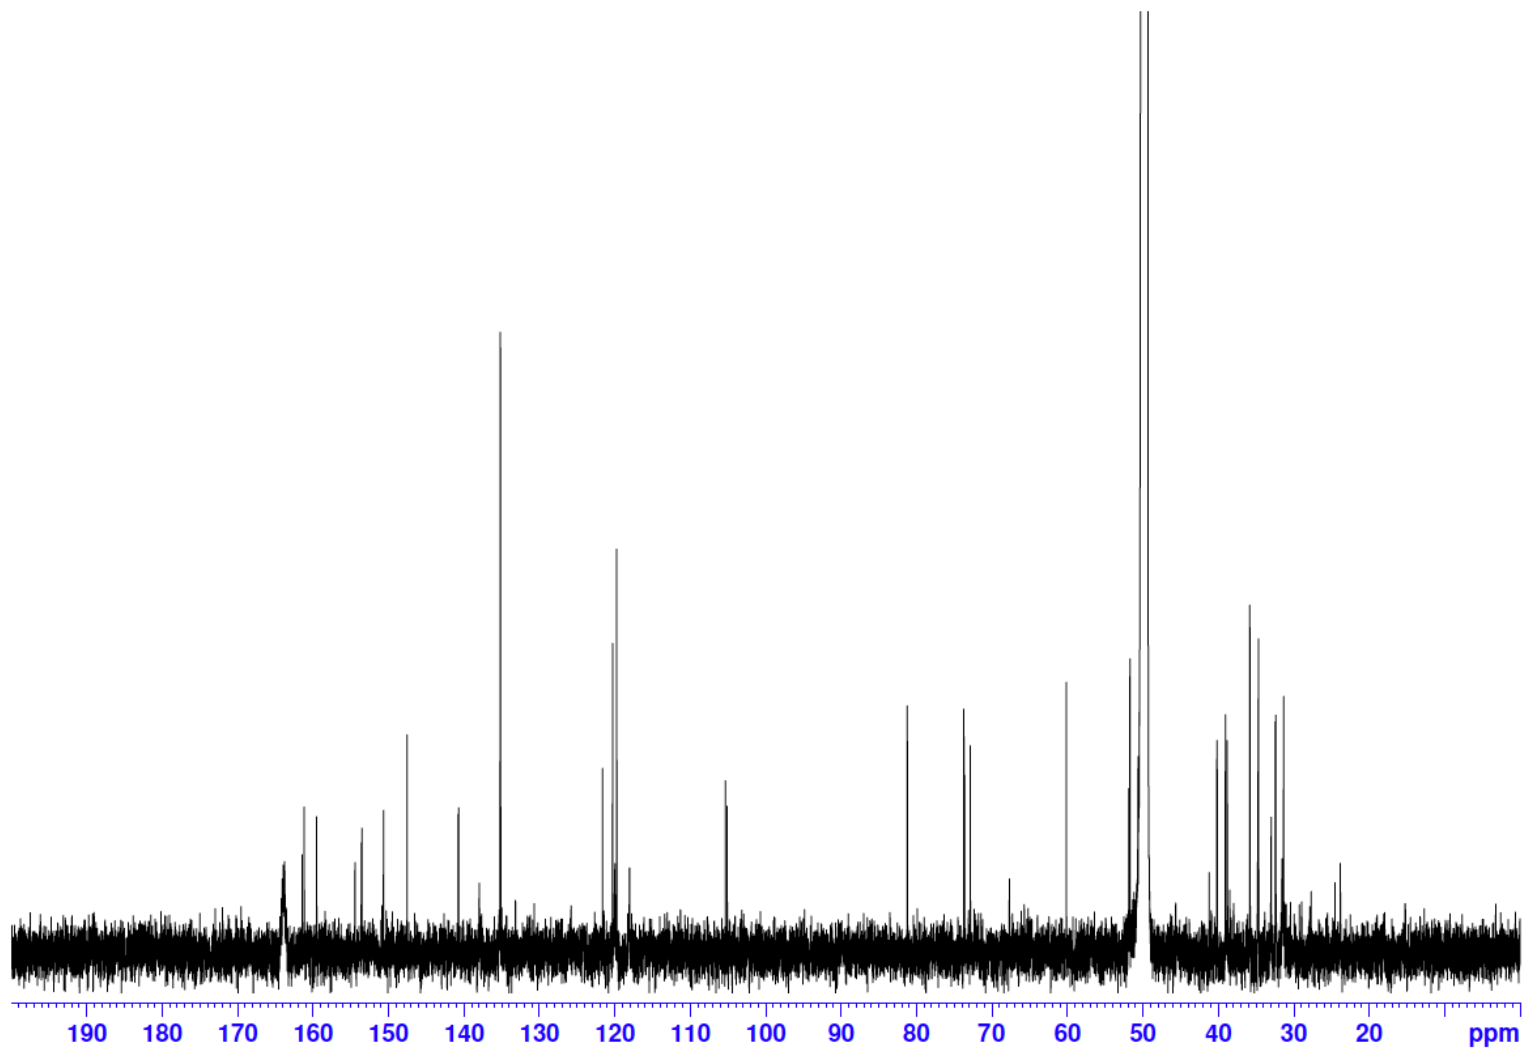

Figure S15.  $^1\text{H}$ - $^1\text{H}$  COSY spectrum of ceratinadin F (**2**) in  $\text{CD}_3\text{OD}$  (600 MHz).

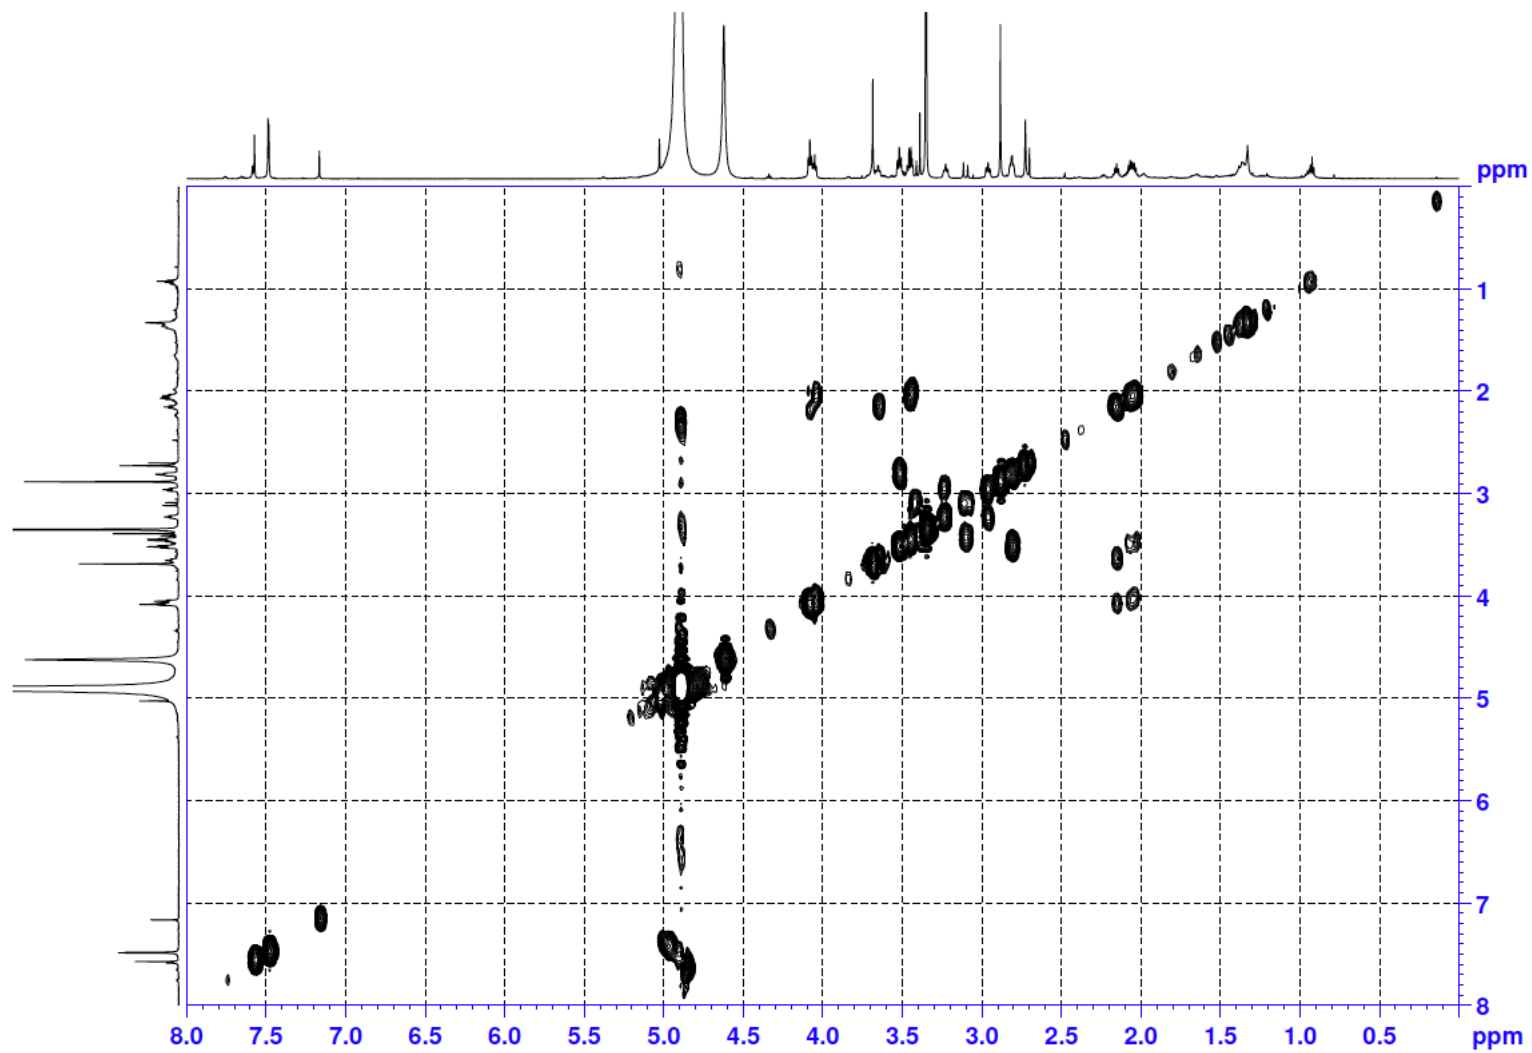



Figure S16. HSQC spectrum of ceratinadin F (2) in CD<sub>3</sub>OD (600 MHz).

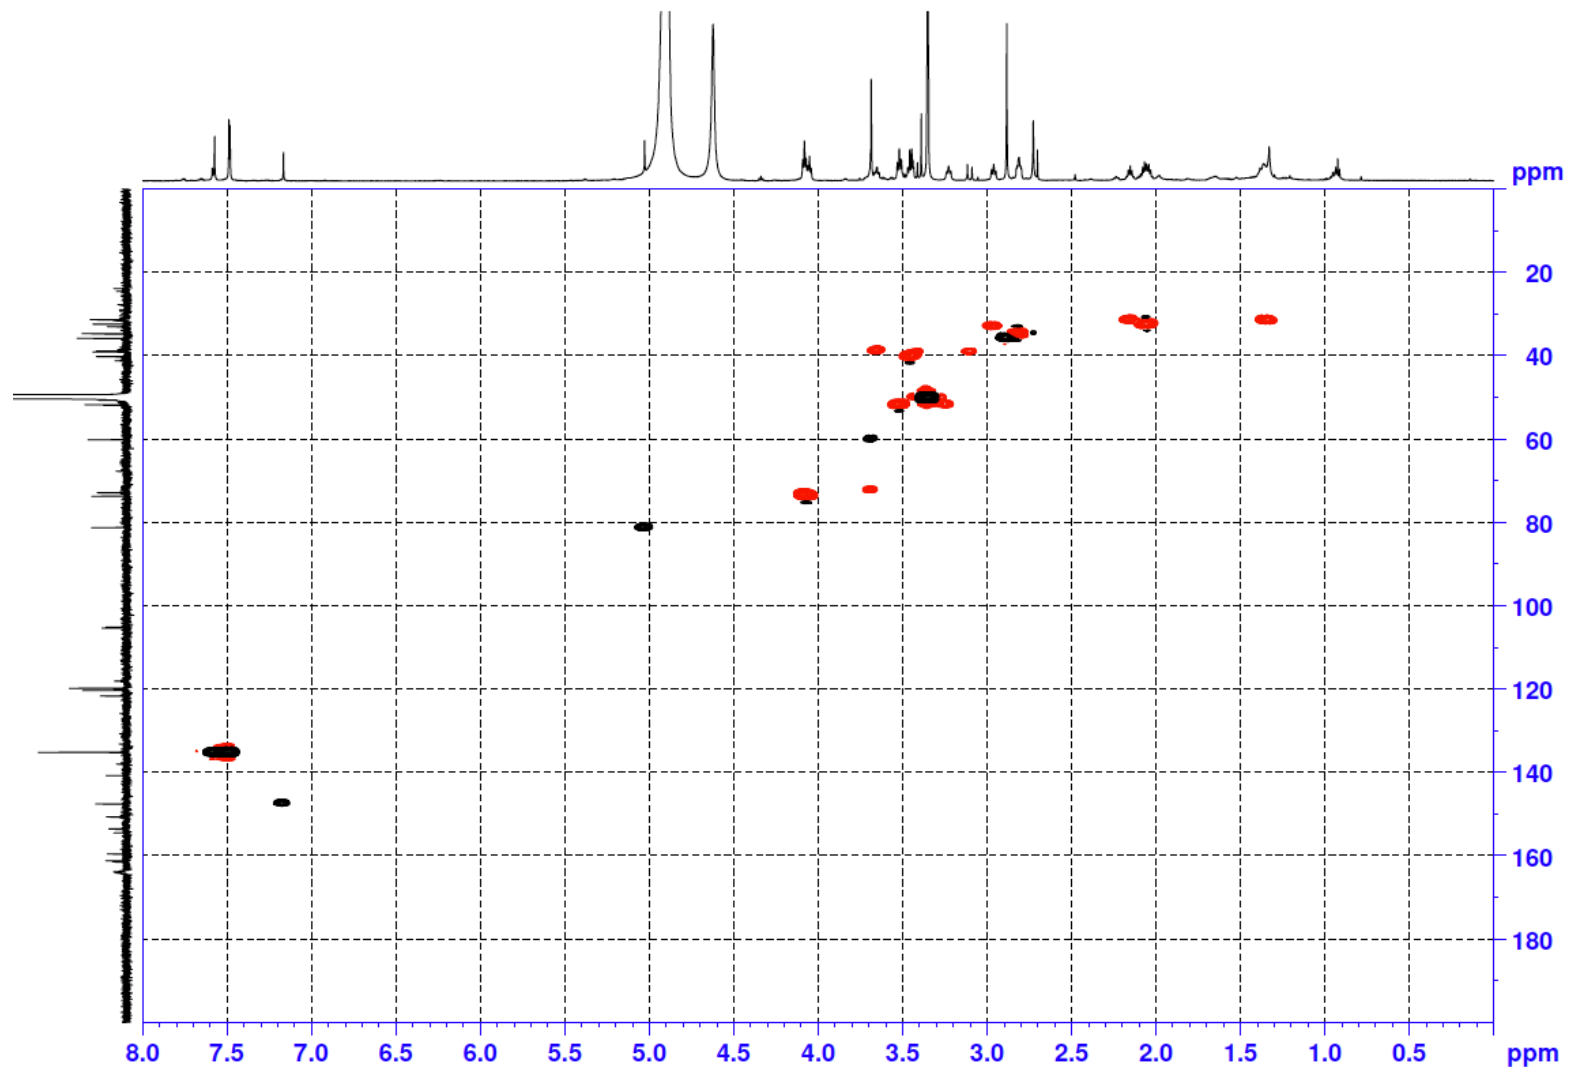

Figure S17. HMBC spectrum of ceratinadin F (2) in CD<sub>3</sub>OD (600 MHz).

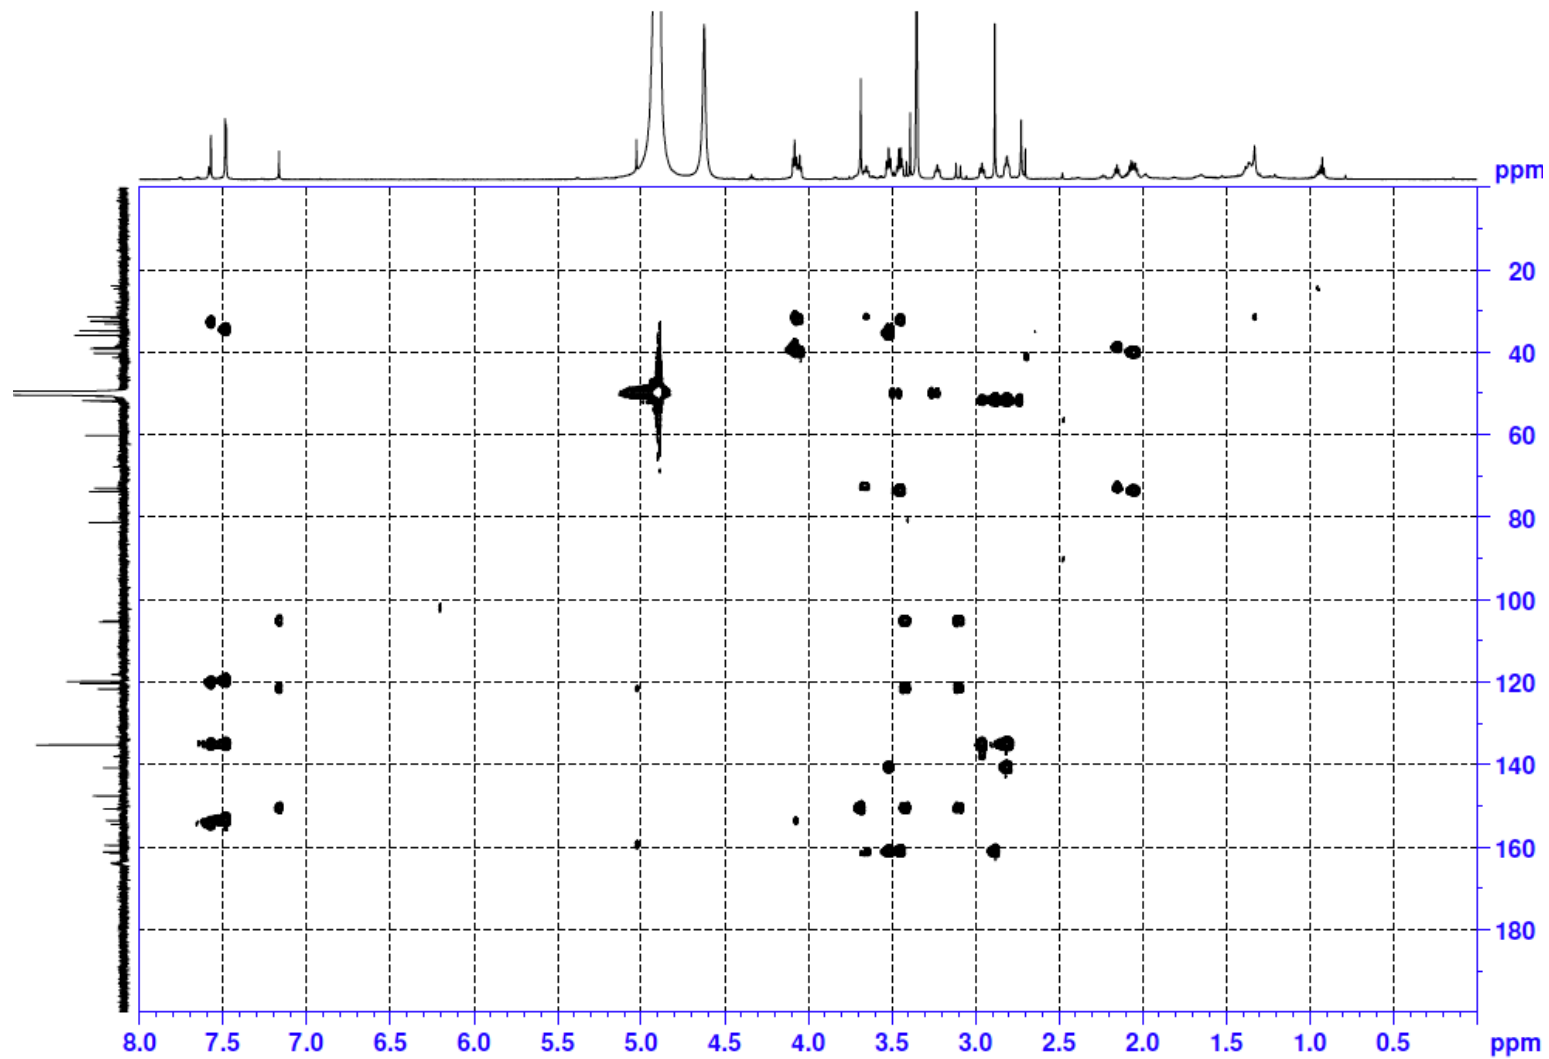

**Figure S18.** ECD spectrum of ceratinadin F (**2**) in CH<sub>3</sub>OH.

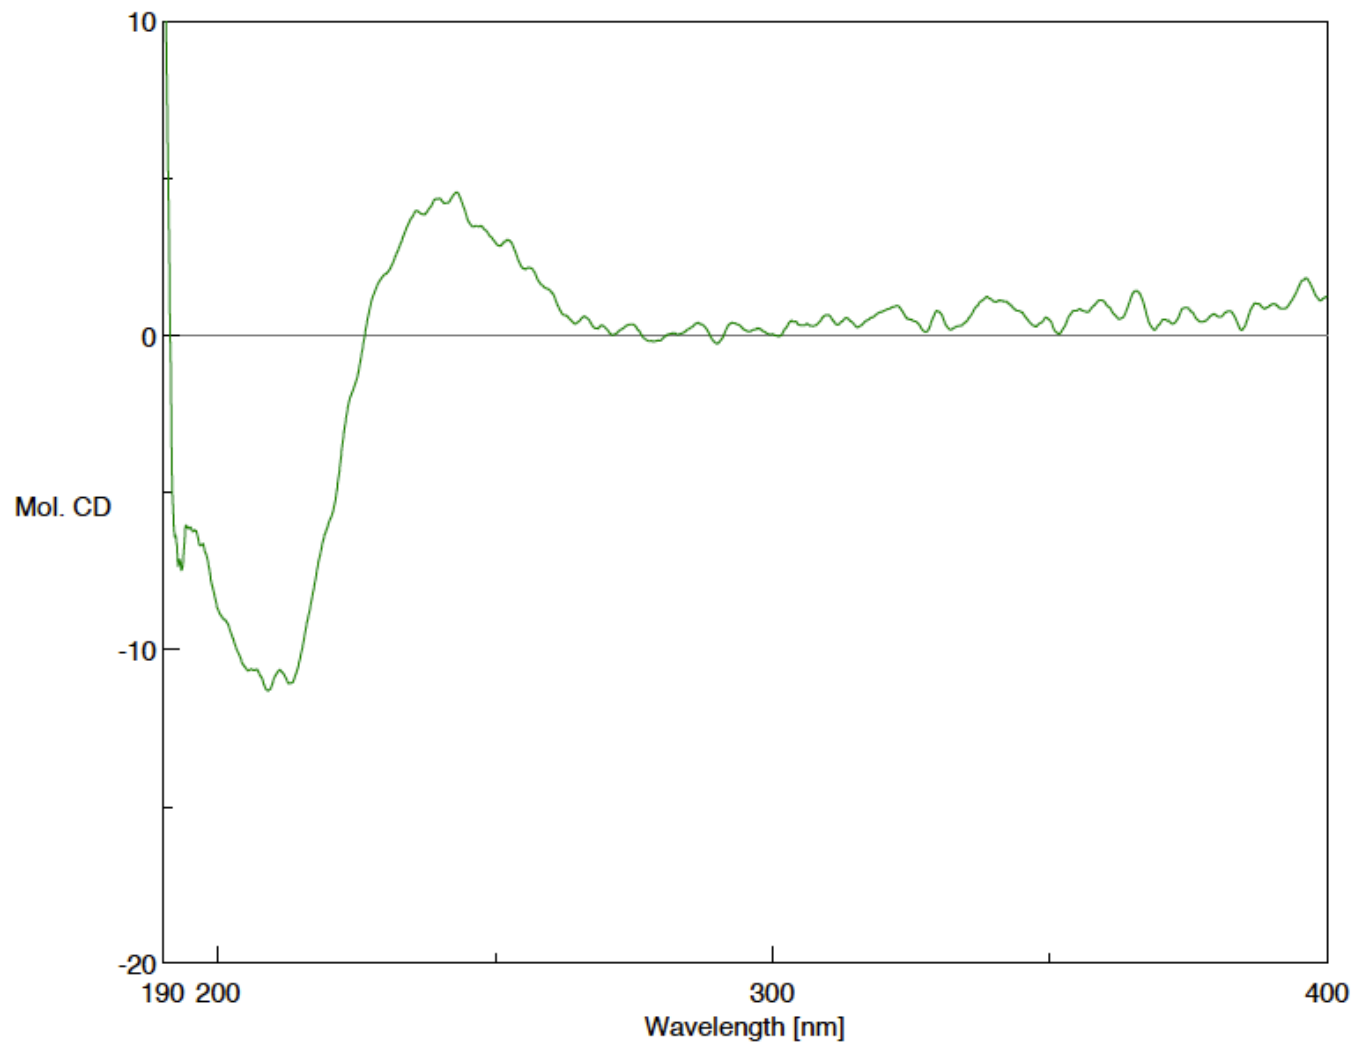

Supplement: marinedrugs-16-00463-s001.pdf [file marinedrugs-16-00463-s001.pdf]
